# Supplementary material
Source: MDPI journal article supplement (https://www.mdpi.com/2673-4583/5/1/32)

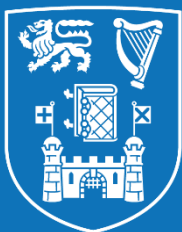

**Trinity College Dublin**

Coláiste na Tríonóide, Baile Átha Cliath

The University of Dublin

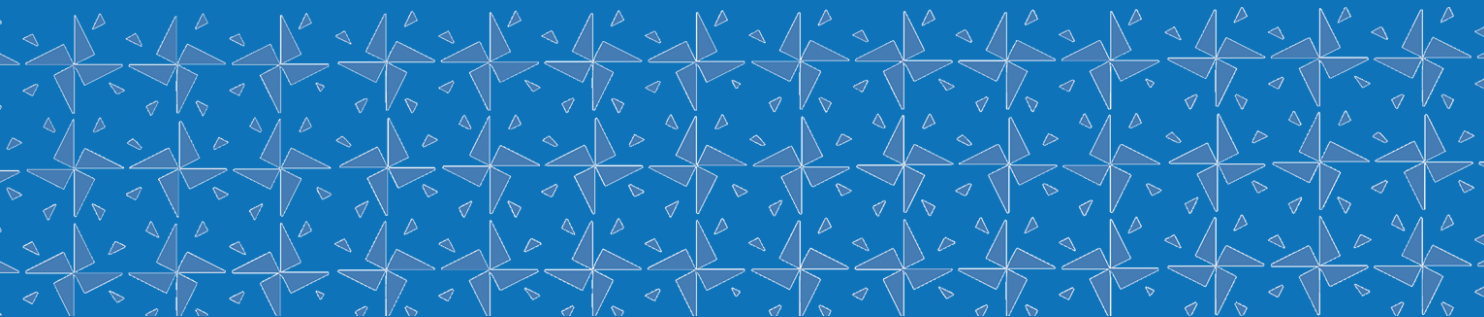

# Core Modulation of Porphyrins for Chemical Sensing

Karolis Norvaiša

Under supervision of Prof. Dr. Mathias O. Senge

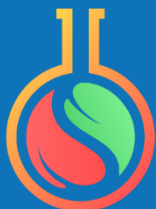

**Senge  
Group**

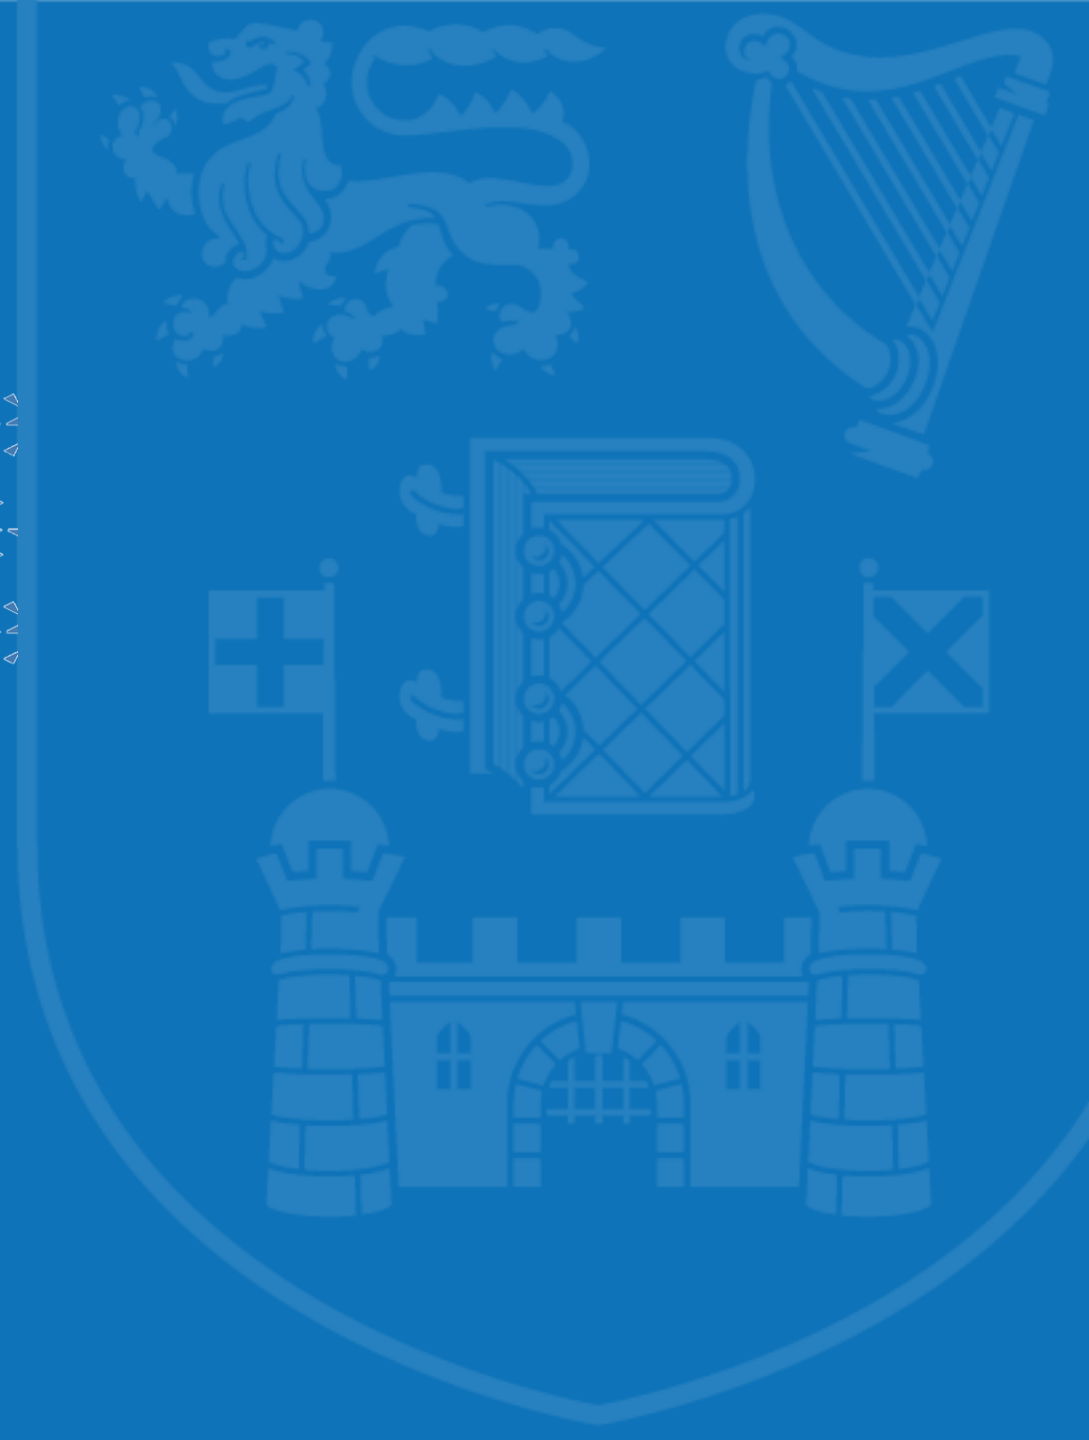

# Two Most Common Sensing Platforms

- a) Separate recognition and reporter units are linked together;
- b) Receptor and reporter functions as one organic framework.

a) Type 1

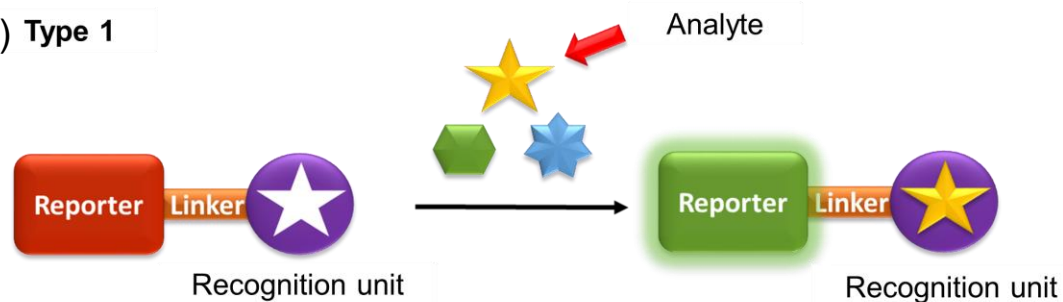

e.g.

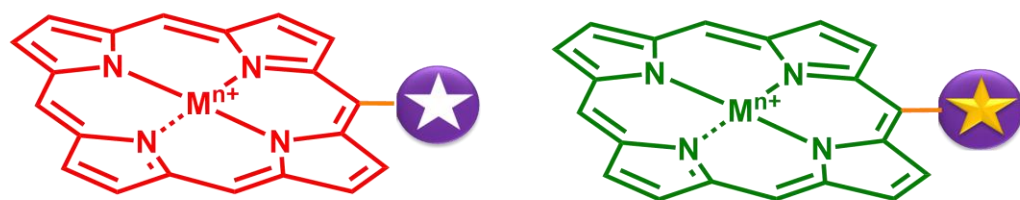

b) Type 2

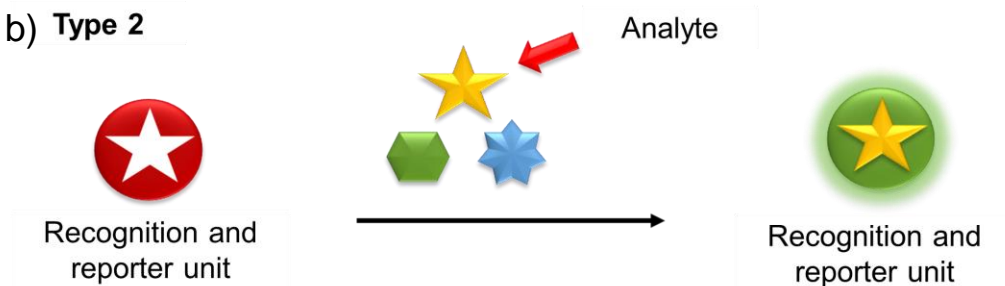

e.g.

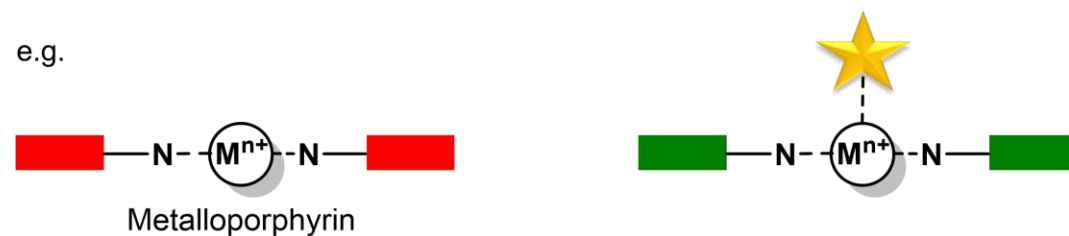

Front Cover:

M. O. Senge et al.

Porphyrins as Colorimetric and Photometric Biosensors in Modern Bioanalytical Systems

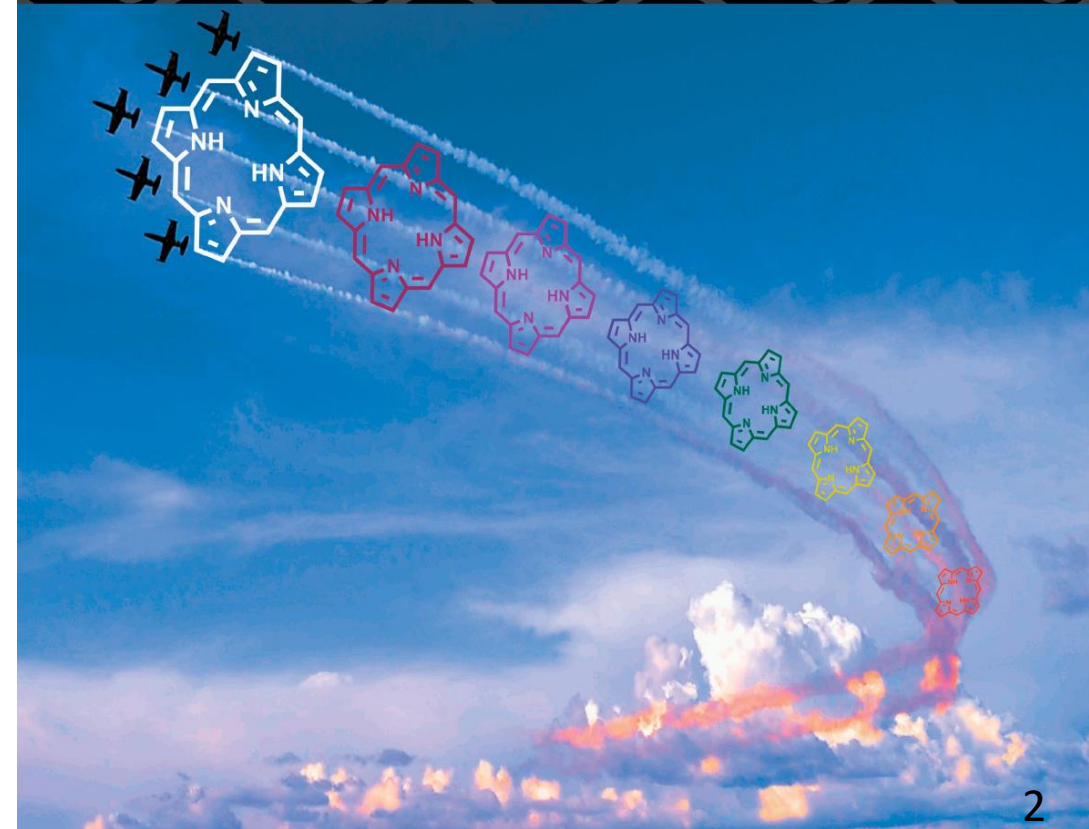

# Molecular Engineering\*

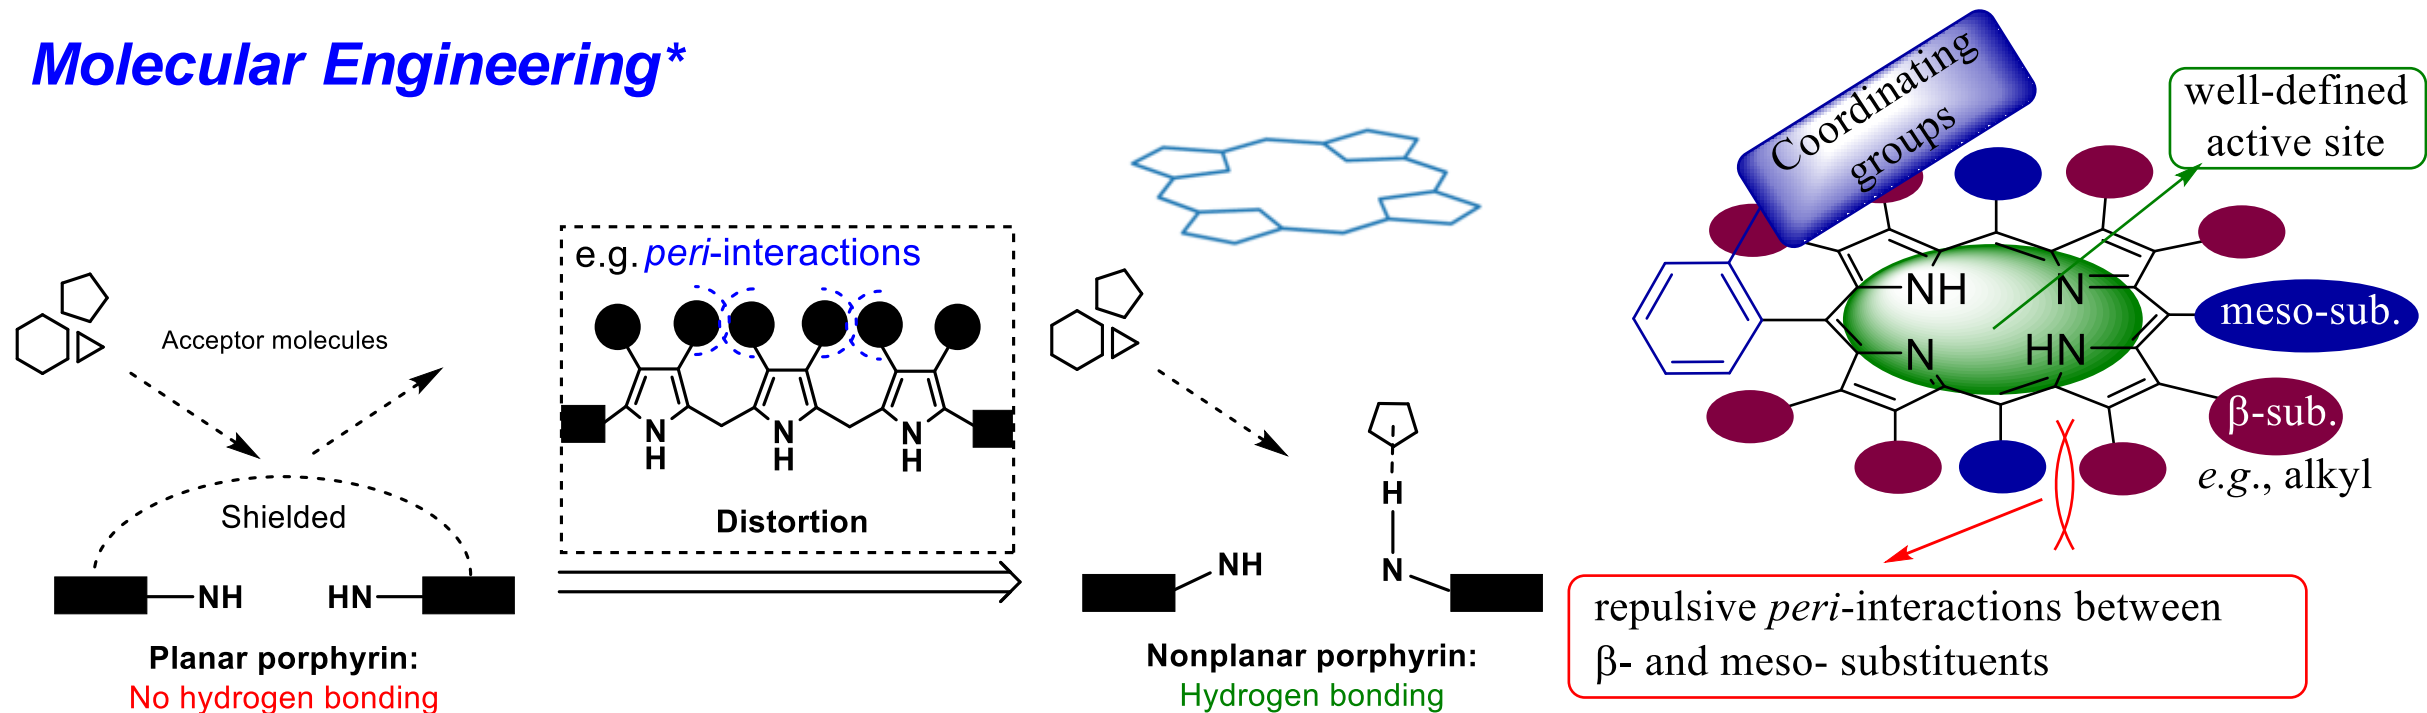

# Strategy

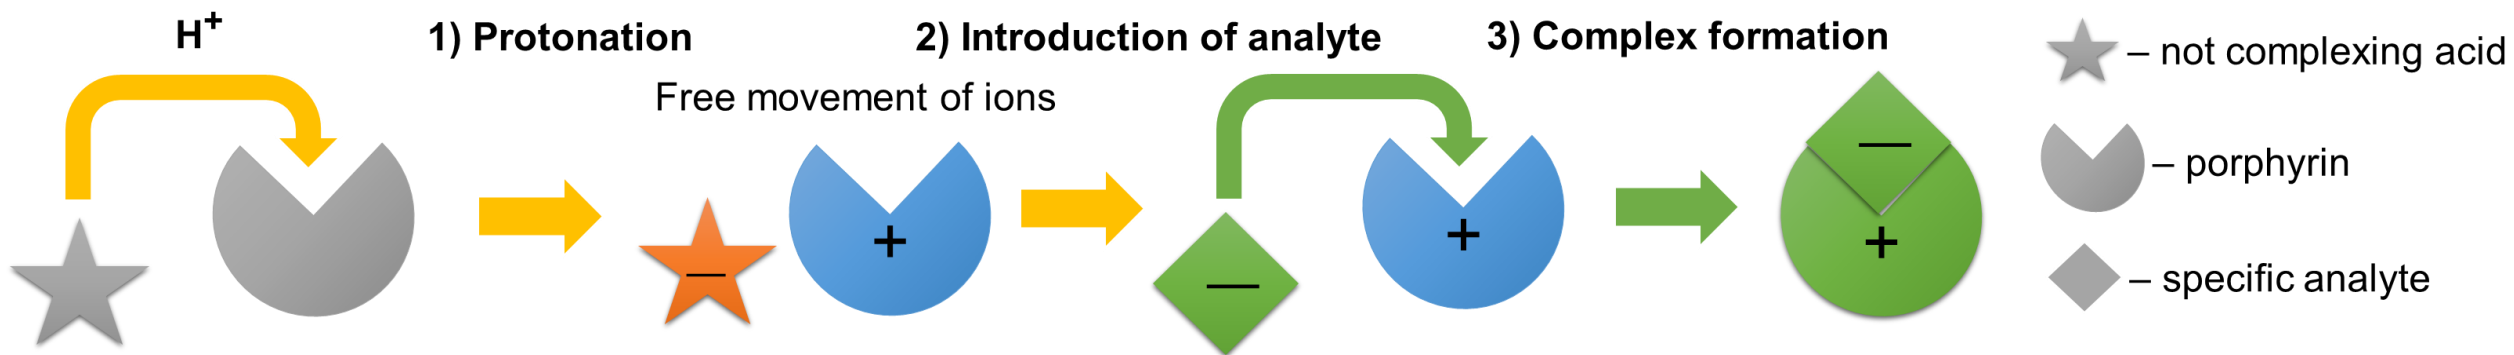

\*M. Kielmann and M. O. Senge, *Angew. Chem. Int. Ed.*, **2019**, 58, 418–441.

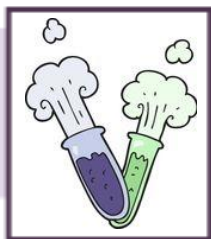

# Synthesis

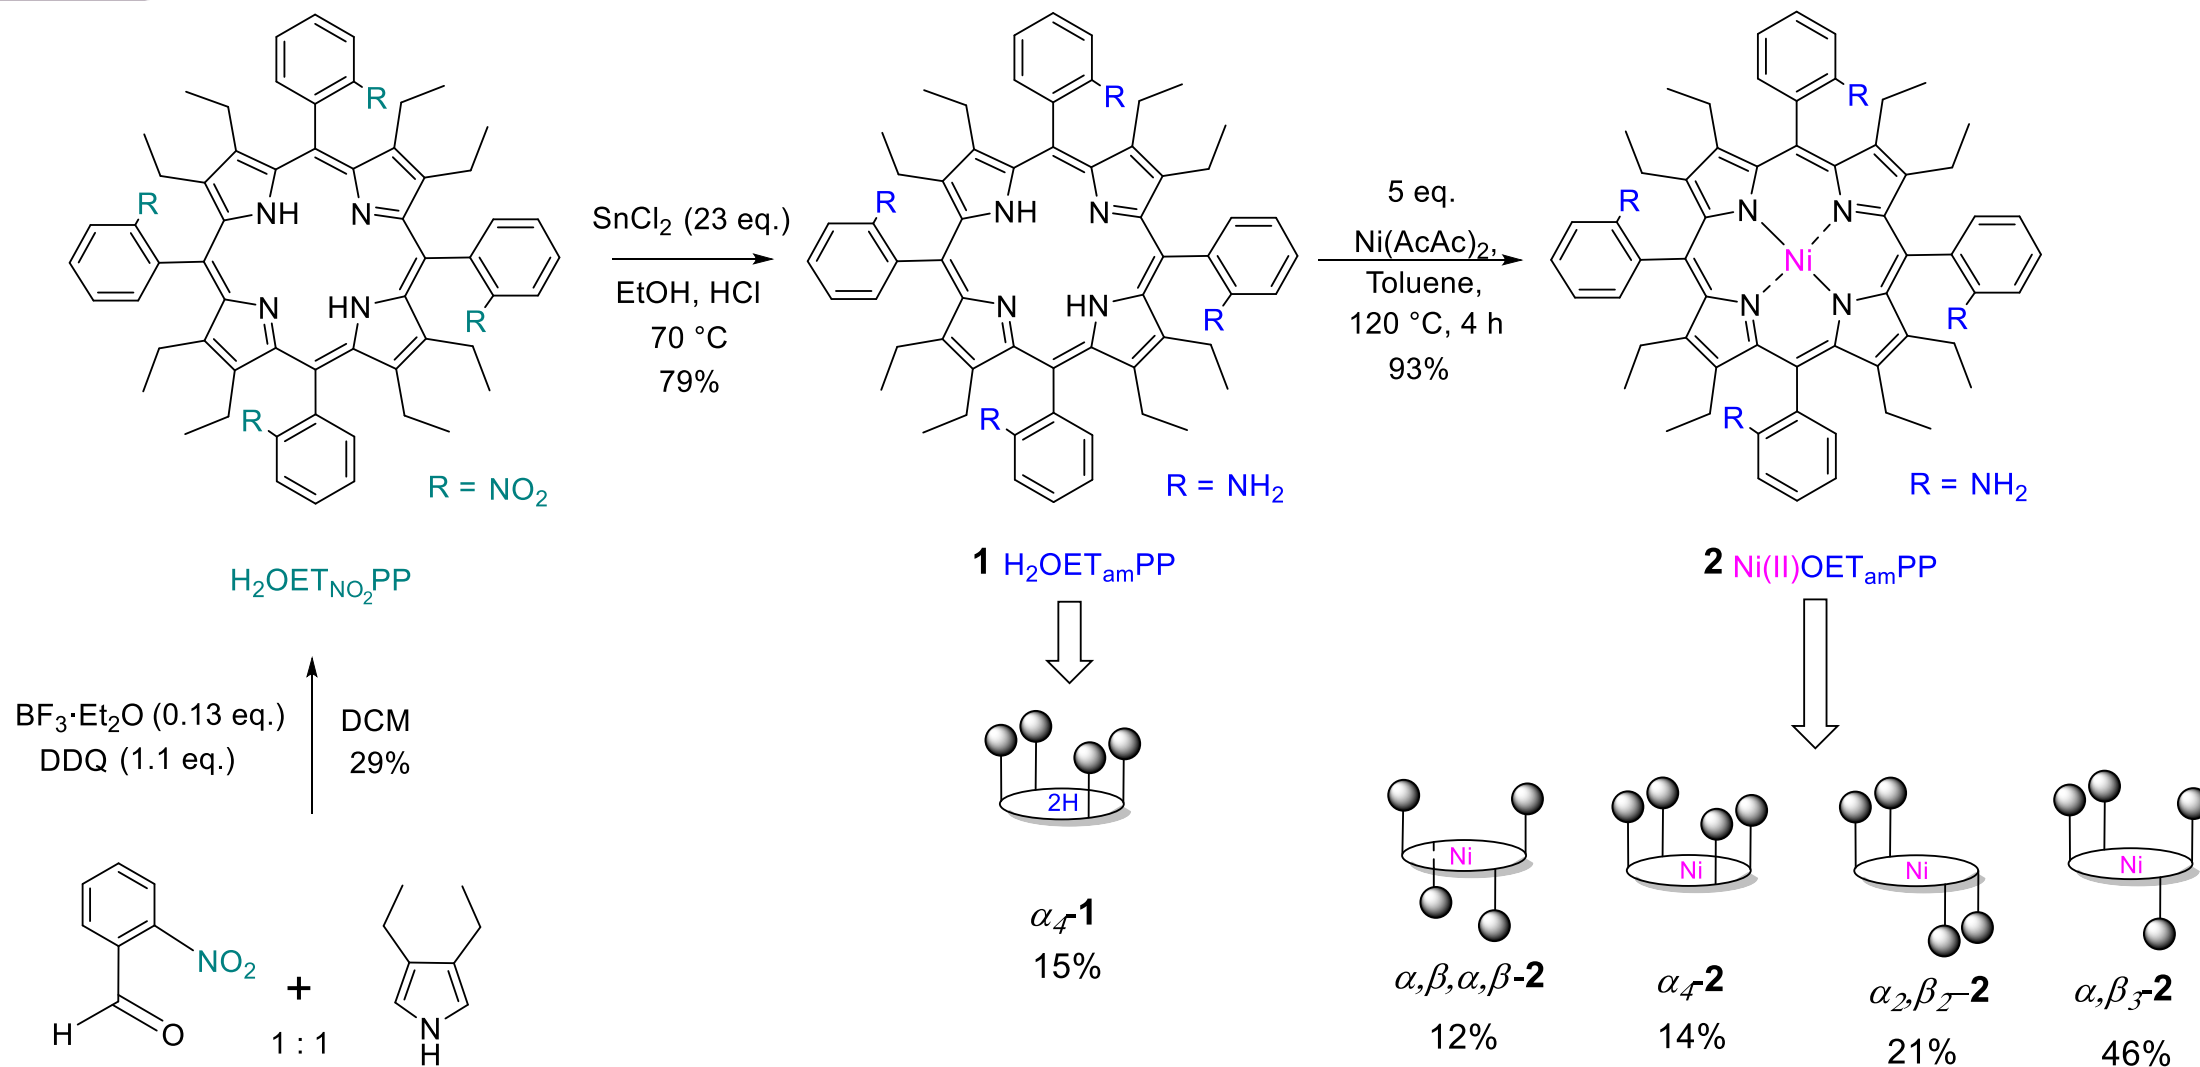

# UV-vis Responses of the Porphyrin Receptor to Analytes

Studies carried out in chloroform

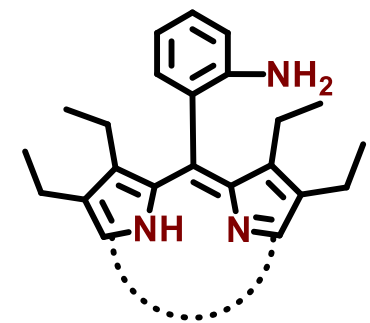

$a_4-1$   $H_2OETP_{am}P$

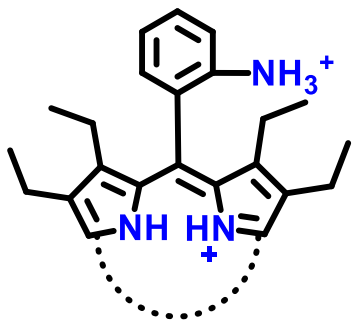

$a_4-P1$   $H_6OETP_{am}P^{6+}$

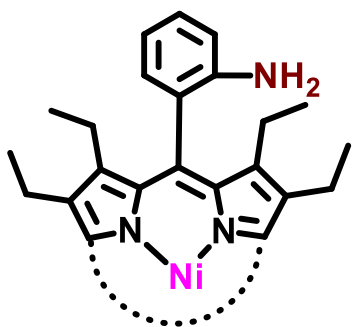

$a_4-2$   $NiOETP_{am}P$

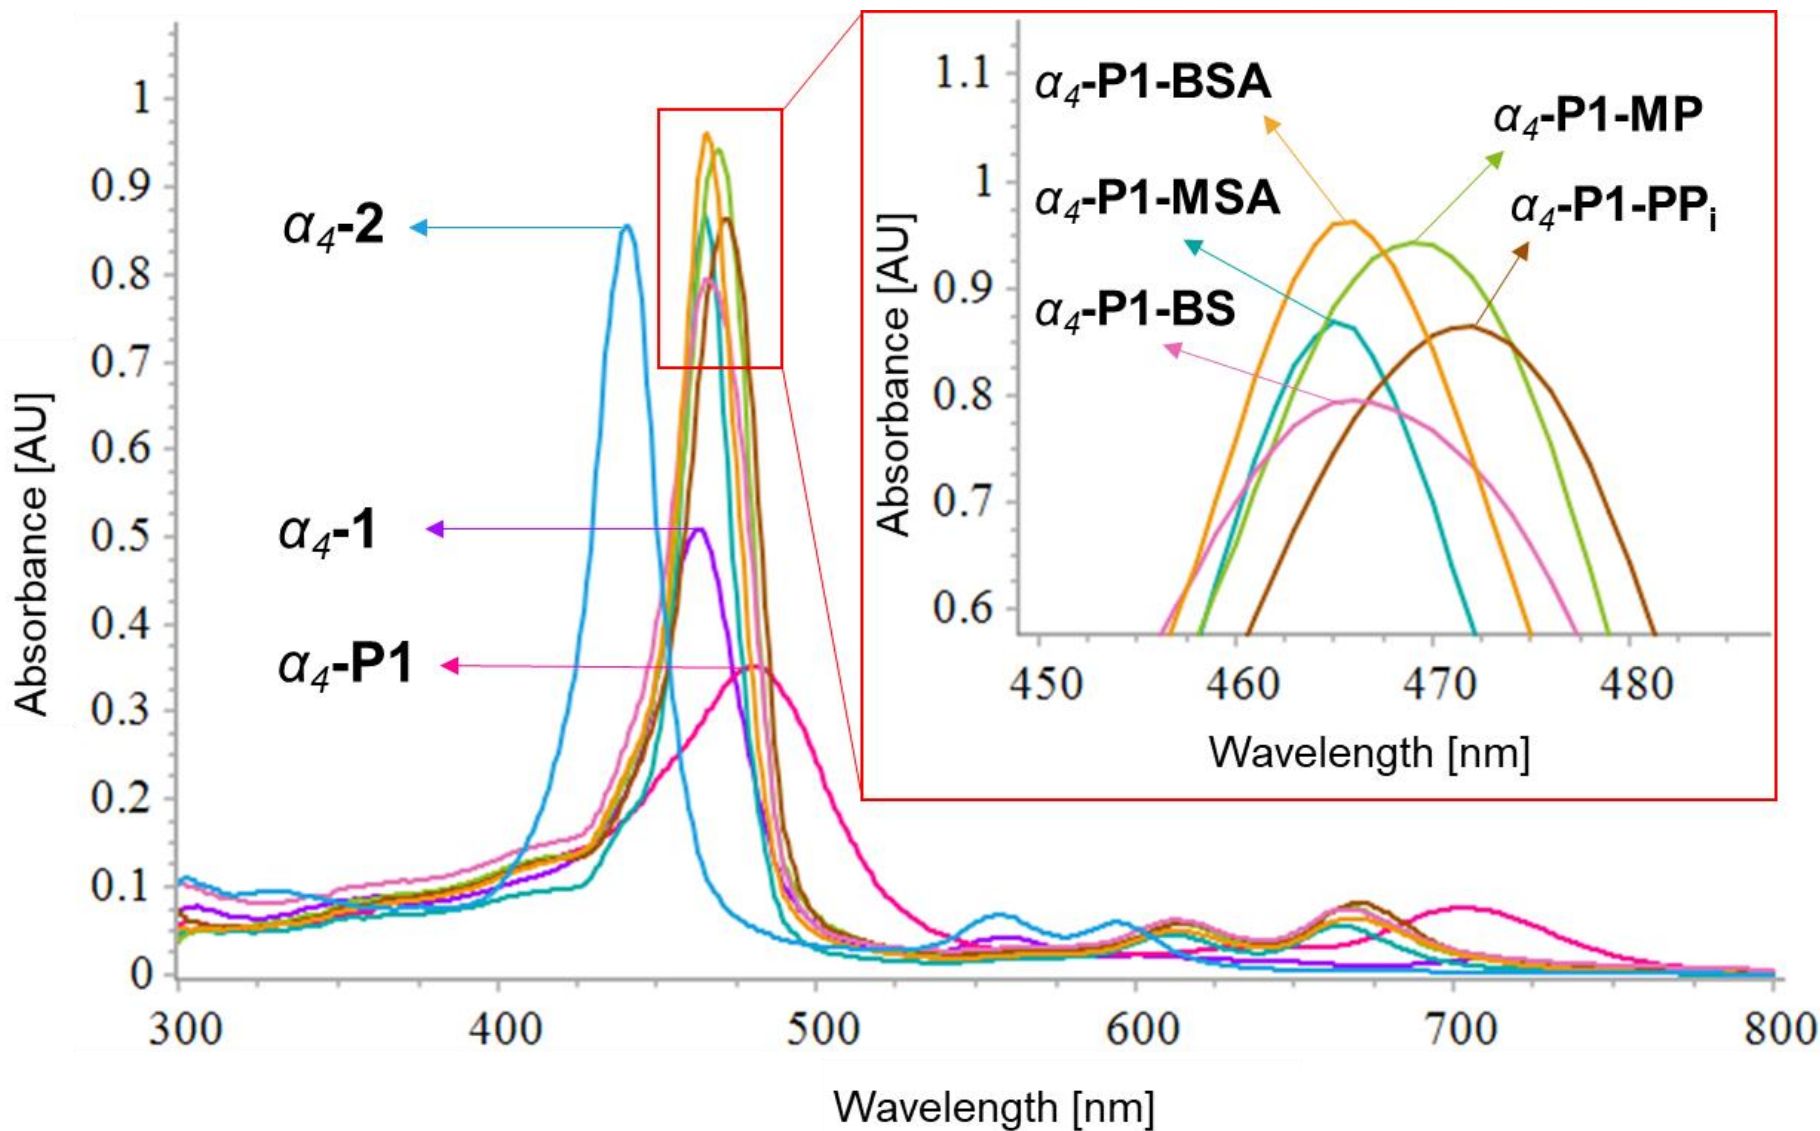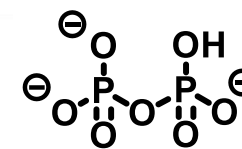

PP<sub>i</sub>

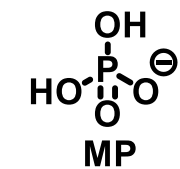

MP

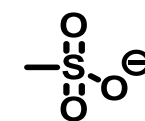

MSA

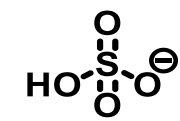

BS

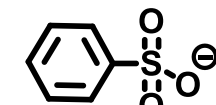

BSA

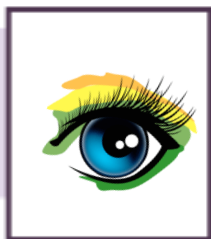

# Switchable, Colorimetric Binding Modes

Colorimetric responses performed in acetonitrile

## COLORIMETRY AND REVERSIBILITY

Colorimetric transition from yellow/brown to green upon substrate coordination

Binds analytes in a switchable manner dependent on the acidity of the solution

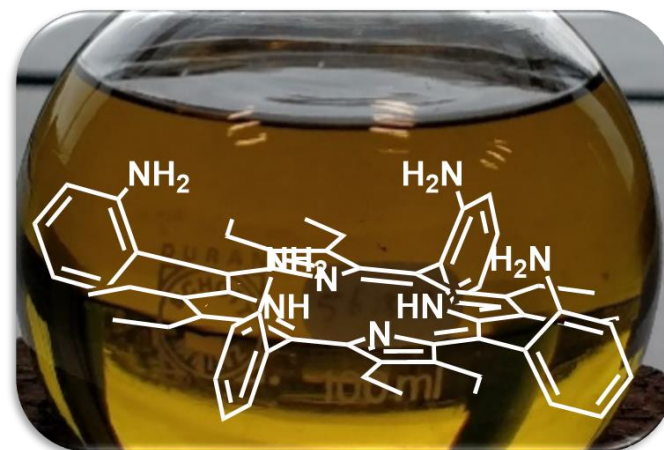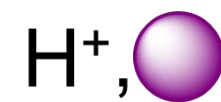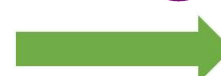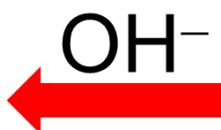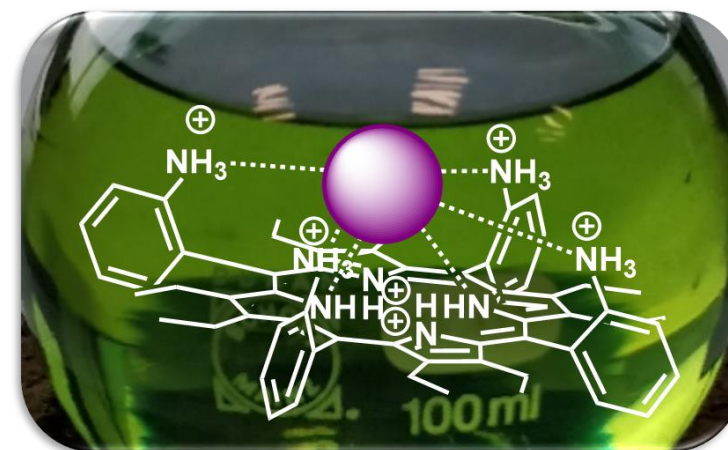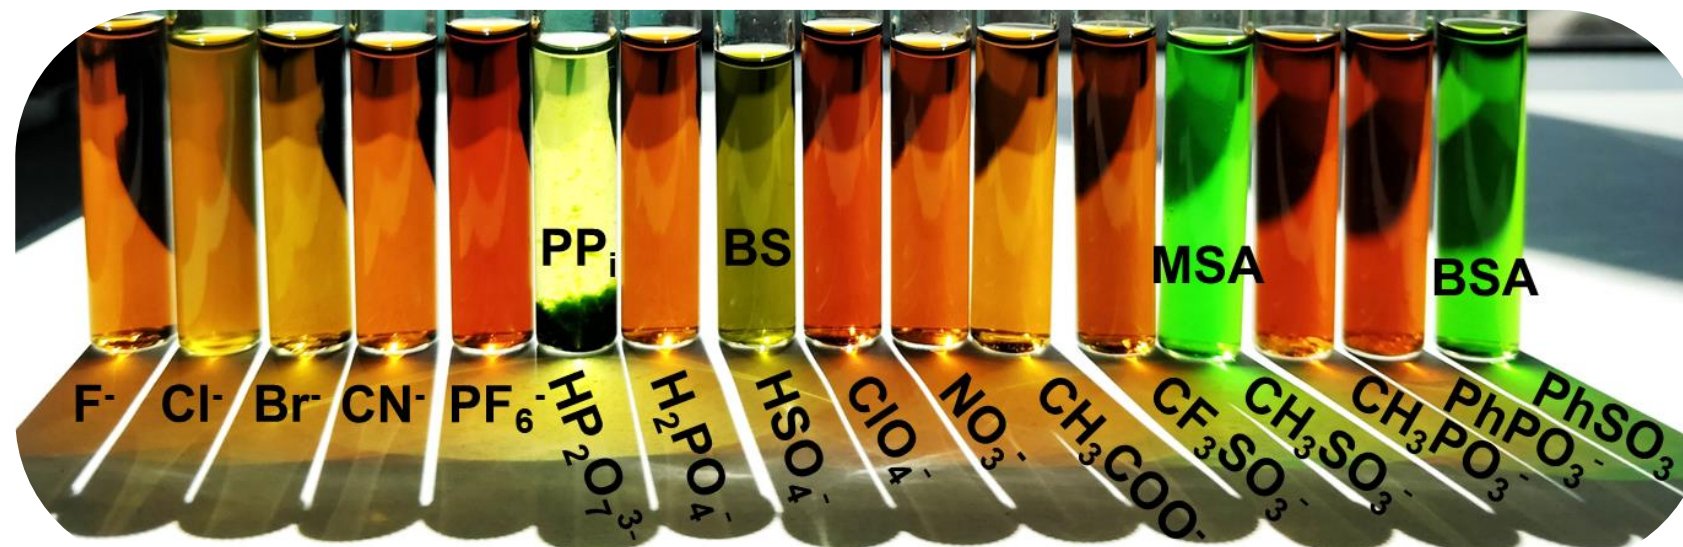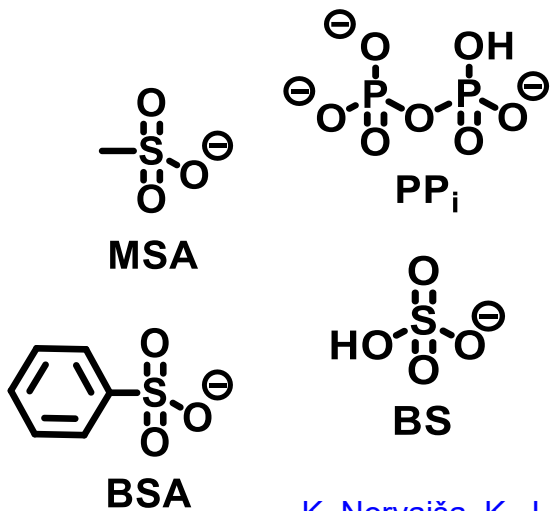

# Confirmation of N-H...X-type Binding Mode

Studies carried out in chloroform

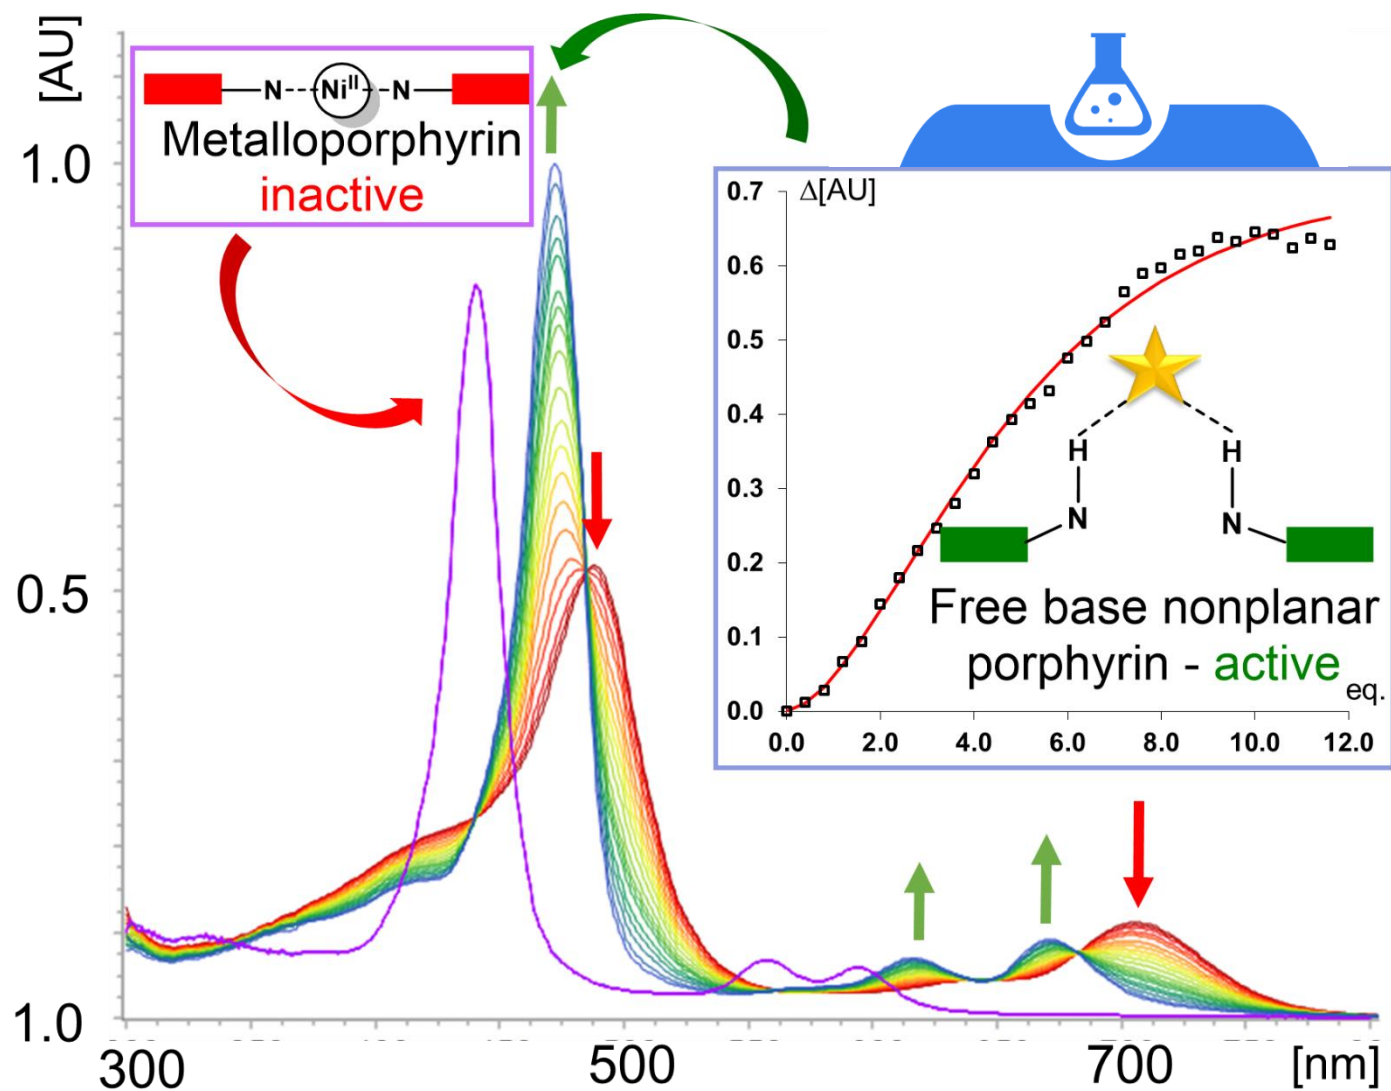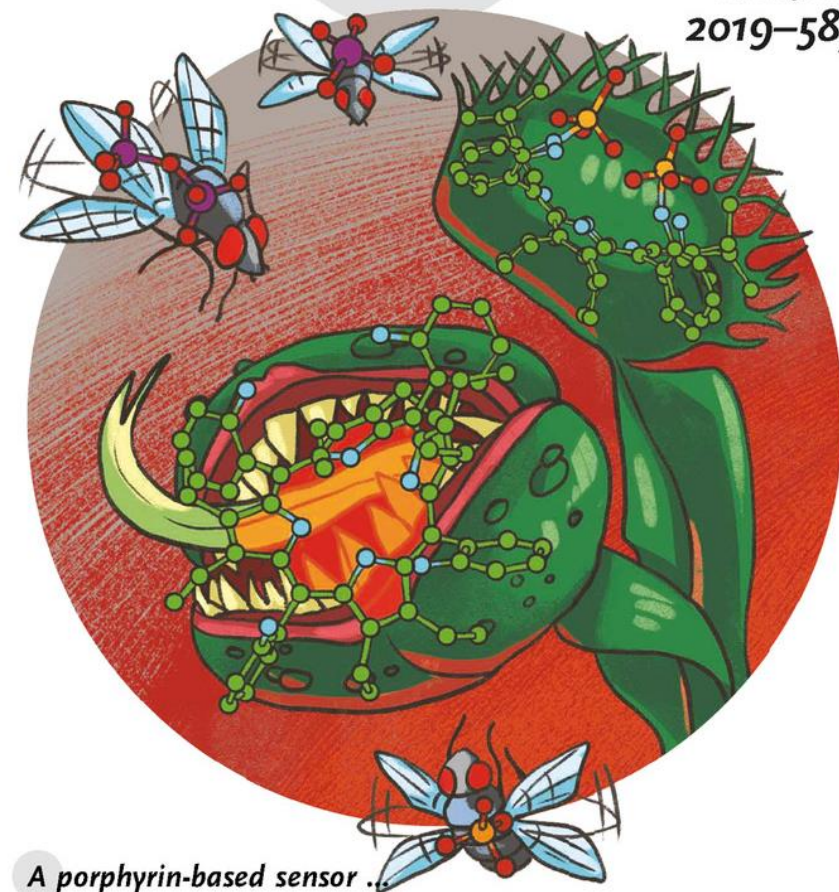

## A porphyrin-based sensor . . .

... for selective detection of anions is described by M. O. Senge and co-workers in their Communication on page 16553. The acid-activated interface between the specially designed binding cavity and corresponding substrates results in distinct spectroscopic alterations with a vibrant colorimetric response. The cover picture by Ella Marushchenko illustrates chemically re-engineered pigments behaving like tiny Venus flytraps that lure anions depicted as flies.

# Binding and Displacement Studies

Studies carried out in chloroform

- – Nitrogen
- – Carbon
- – Hydrogen

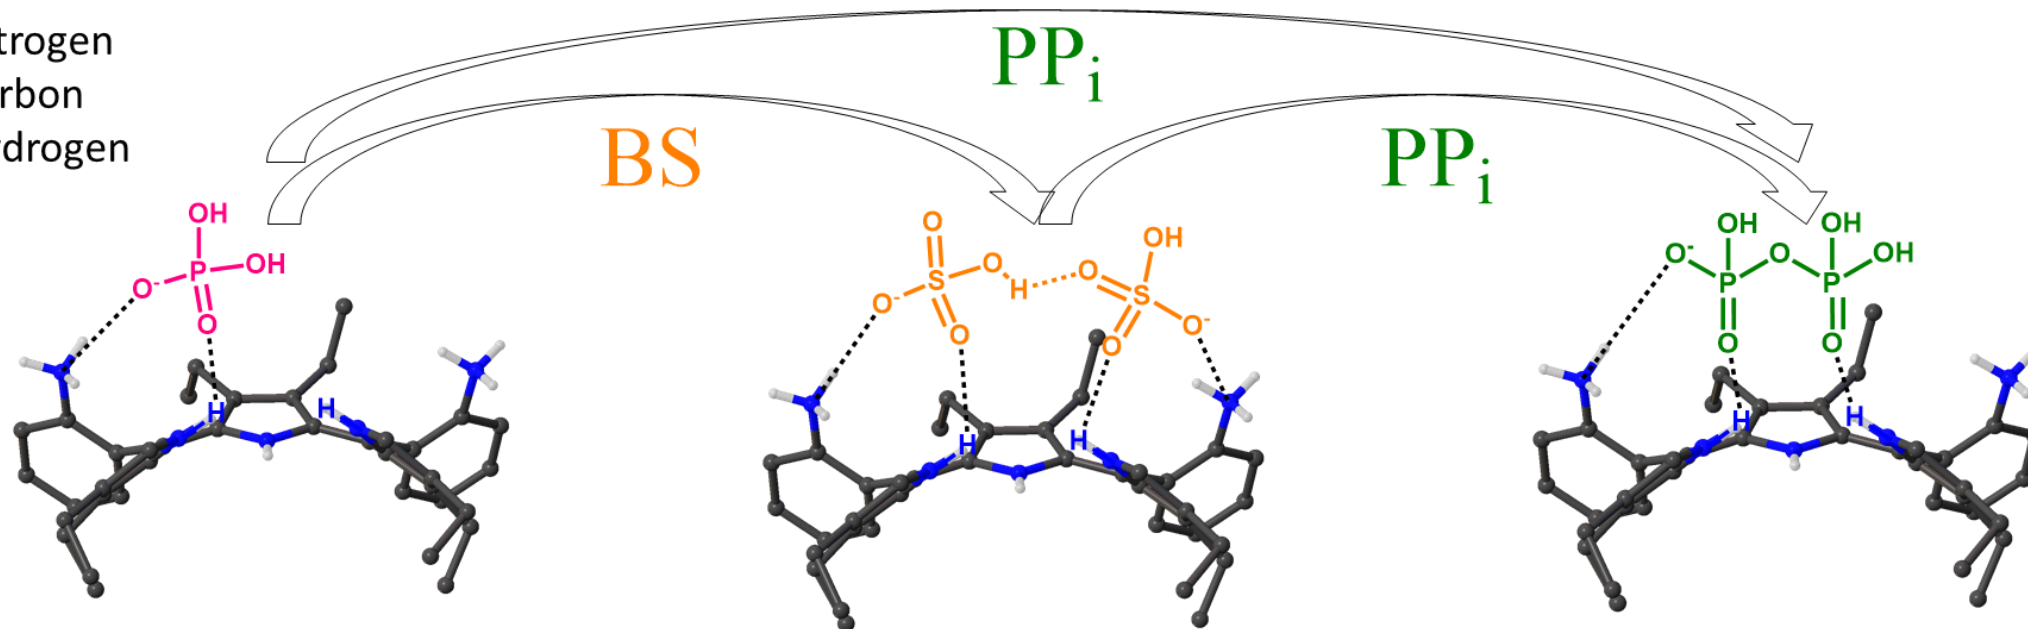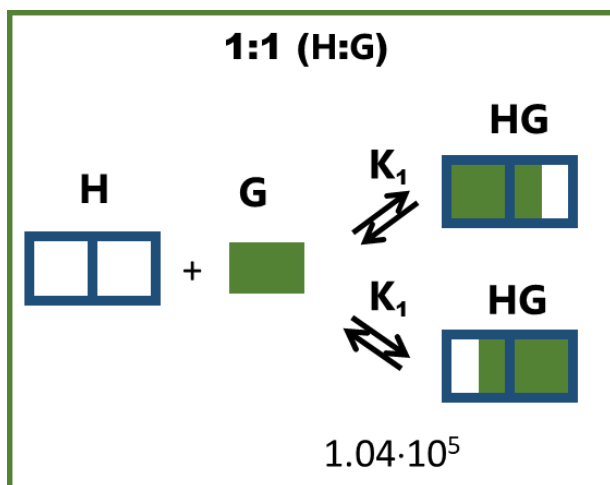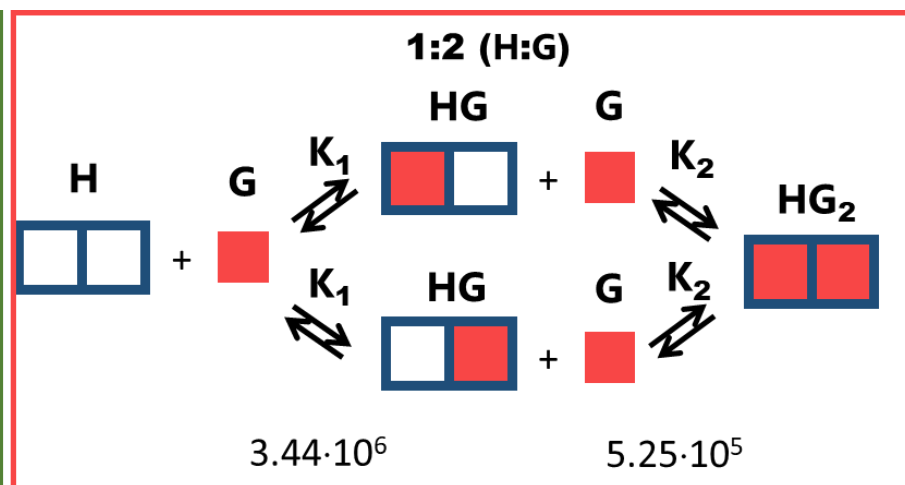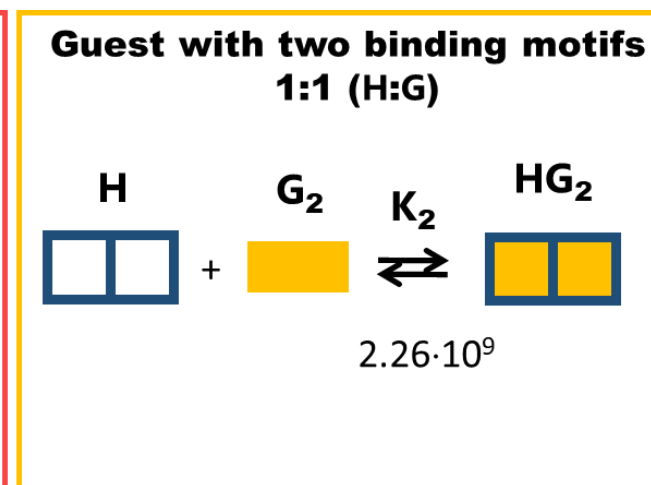



# Identifying Atropisomerism by NMR Studies

Studies carried out in  $d_3$ -acetonitrile and BSA

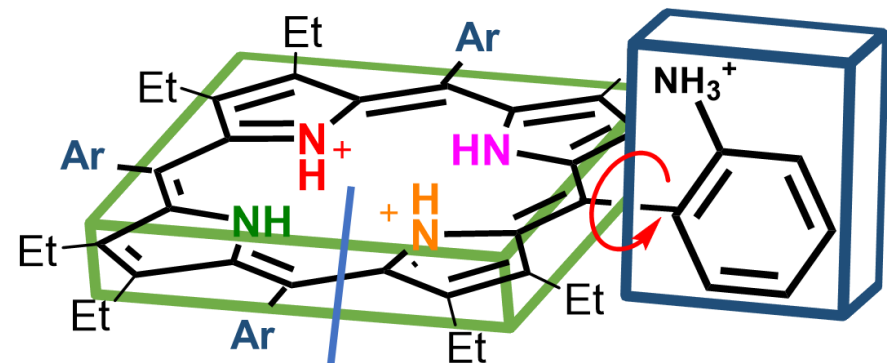

$^1H-^{15}N$  HSQC

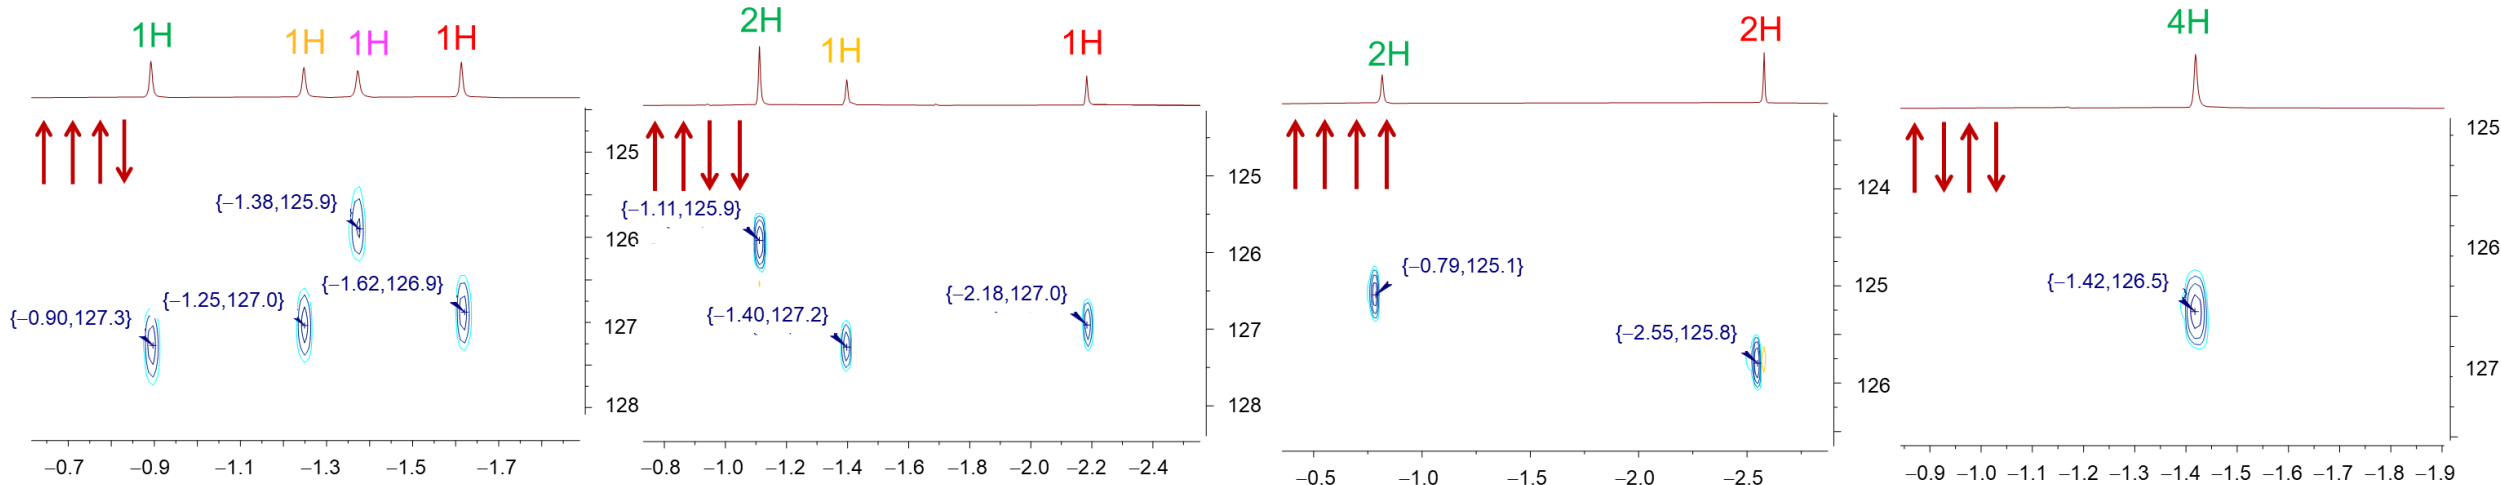

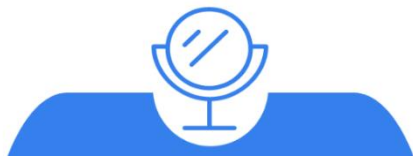

## Symmetry Determination in All Atropisomers

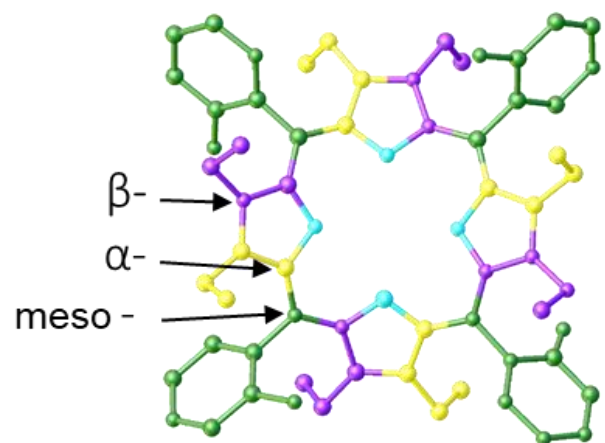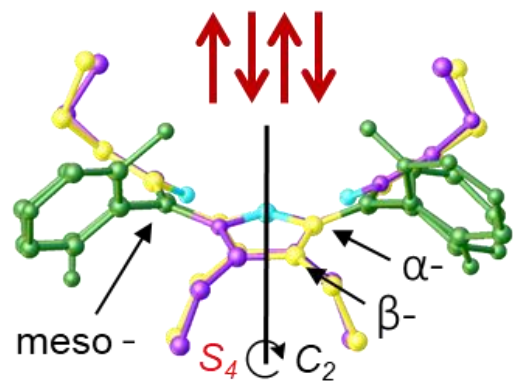

Point group {order}  $S_4$  {4}

Planar\*  $D_{2d}$  {8}

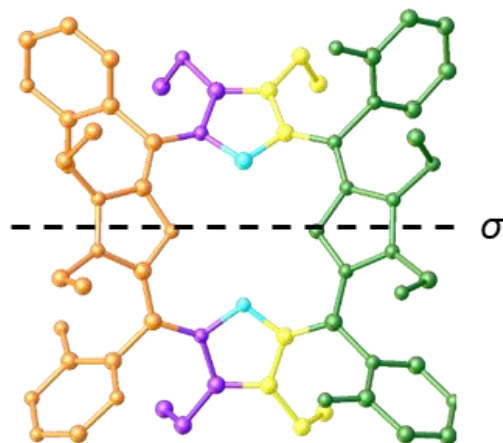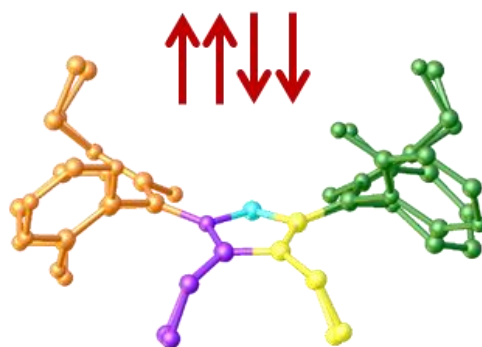

$C_s$  {2}

$C_{2h}$  {4}

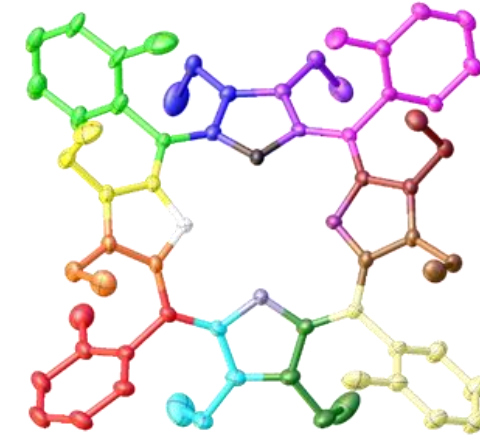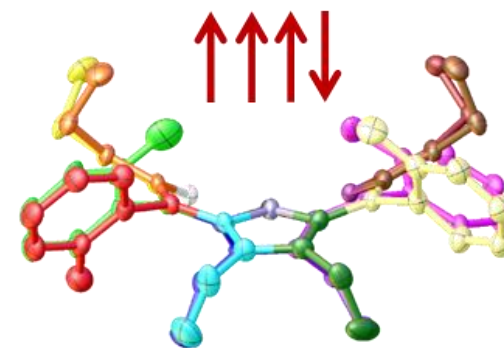

$C_1$  {1}

$C_s$  {2}

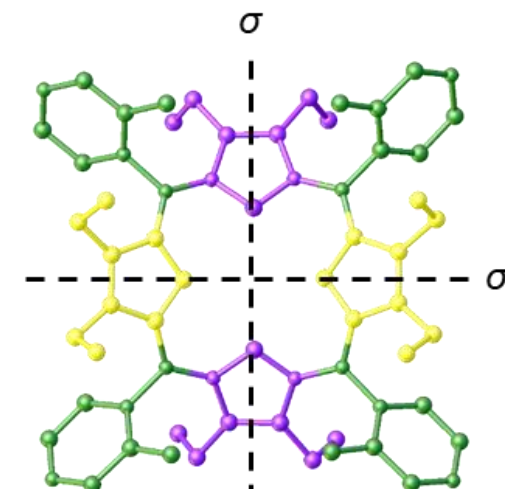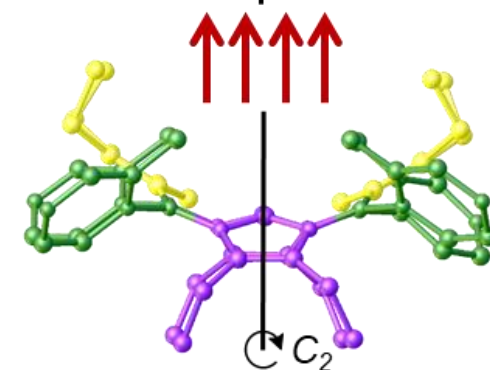

$C_{2v}$  {4}

$C_{4v}$  {8}

# Acknowledgements

Under the supervision of Prof. Dr. Mathias O. Senge

## Post-Docs

Dr. Ganapathi Emandi  
Dr. Nitika Grover  
Dr. Alina Meindl  
Dr. Chris J. Kingsbury  
Dr. Asterios Charisiadis  
Dr. Marc Kielmann  
Dr. Keith J. Flanagan

## Technical Staff

Dr. Brendan Twamley  
Dr. Gary Hessman  
Dr. John E. O'Brien

**Thank you for  
your attention**

## Ph.D Students

Bhavya Khurana  
Elisabeth Sitte  
Gemma Locke  
Harry C. Sample  
Jessica O'Brien  
Marie Roucan  
Piotr Gierlich  
Susan Callaghan  
Zoi Melissari  
Claire Donohoe  
Dáire J. Gibbons

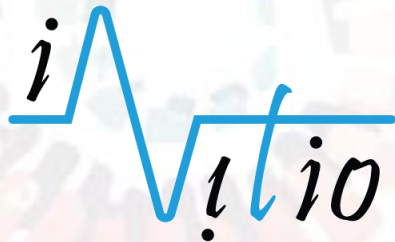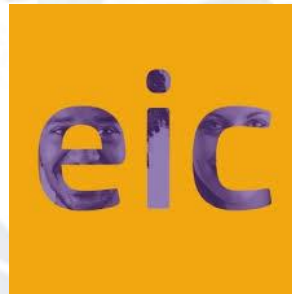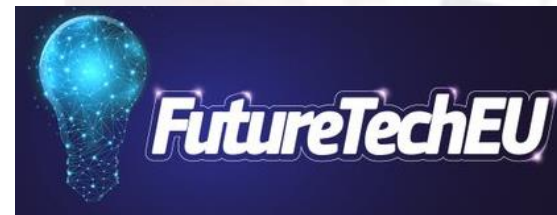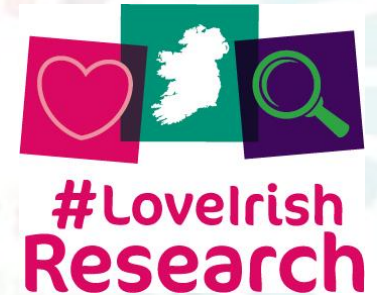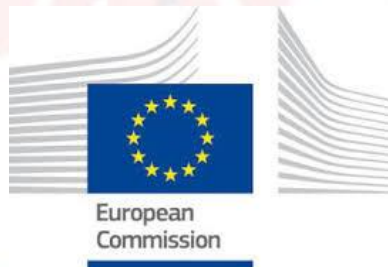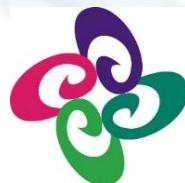

IRISH RESEARCH COUNCIL  
An Chomhairle um Thaighde in Éirinn  
[www.research.ie](http://www.research.ie)

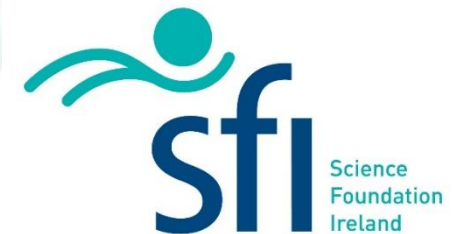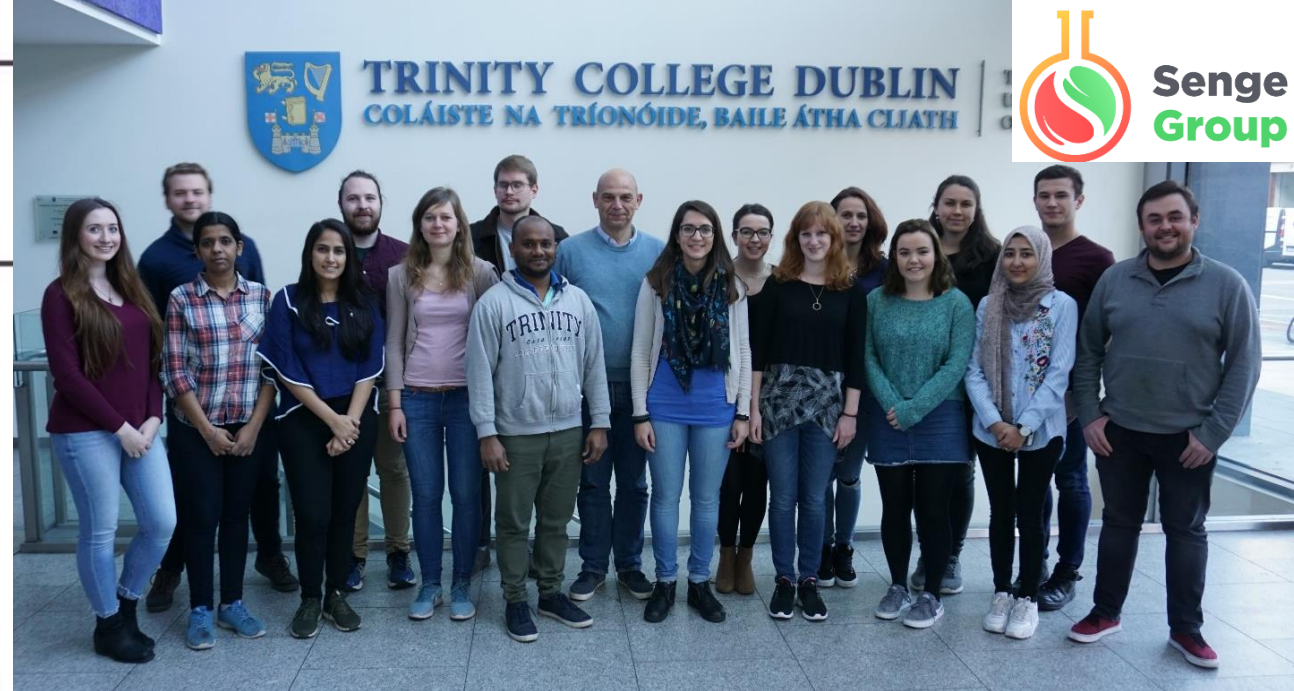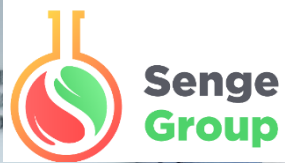

Supplement: s1 [file s1]
