# Supplementary material
Source: MDPI journal article supplement (https://www.mdpi.com/2673-4583/5/1/32)
Supplement: s1 [file s1]

## CSAC2021

### Section: Materials for Chemical Sensing

#### *Core Modulation of Porphyrins for Chemical Sensing*

The inner core system of metal-free ('free base') porphyrins has continually served as a ligand for various metal ions, but only recently was studied in organocatalysis due its highly tuneable basicity. Highly conjugated porphyrin systems offer spectrophotometric sensitivity towards geometrical and/or electronic changes and thus, utilizing the porphyrin core for selective detection of substrates in solution offers significant potential for a multitude of applications. However, solvation and dilution drastically affect weak interactions by dispersing the binding agent to its surroundings. Thus, spectroscopic detection of N–H...X-type binding in porphyrin solutions is almost impossible without specially designing the binding pocket.

Here we present the first report on spectroscopic detection of the N–H...X-type interplay in porphyrins formed by weak interactions. Protonated 2,3,7,8,12,13,17,18-octaethyl-5,10,15,20-tetrakis(2-aminophenyl)porphyrin contains coordination sites for selective binding of charge-bearing analytes, revealing characteristic spectroscopic responses. While electronic absorption spectroscopy proved to be a particularly useful tool for the detection of porphyrin-analyte interactions in the supramolecular complexes, X-ray crystallography helped to pinpoint the orientation, flexibility, and encapsulation of substrates in the corresponding atropisomers.

This charge-assisted complexation of analytes in the anion-selective porphyrin inner core system is ideal for the study of atropisomers by high-resolution NMR, since it reduces the proton exchange rate, generating static proton signals. Therefore, we were able to characterize all four rotamers of the nonplanar 2,3,7,8,12,13,17,18-octaethyl-5,10,15,20-tetrakis(2-aminophenyl)porphyrin by performing 1D and 2D NMR spectroscopic analyses of host-guest systems consisting of benzenesulfonic acid (BSA) and each porphyrin atropisomer. Lastly, detailed assignment of the symmetry operations that are unique to porphyrin atropisomers, allowed us to accurately identify the rotamers using NMR techniques only. Overall, the N–H...X-type interplay in porphyrins formed by weak interactions that form restricted H-bonding complexes shows to be the key to unravel the atropisomeric enigma.
